# Supplementary material
Source: MDPI journal article supplement (https://www.mdpi.com/2227-7390/8/8/1295)
Supplement: s1 [file s1]

# Supplementary Materials

*Article*

## Effects of the Angled Blades of Extremely Small Wind Turbines on Energy Harvesting Performance

Junseon Park<sup>1</sup>, Seungjin Lee<sup>1</sup> and Joong Yull Park<sup>1,\*</sup>

<sup>1</sup> Department of Mechanical Engineering, Graduate School, Chung-Ang University, 84 Heukseok-ro, Dongjak-gu, Seoul 06974, Republic of Korea

\* Correspondence: jrpark@cau.ac.kr

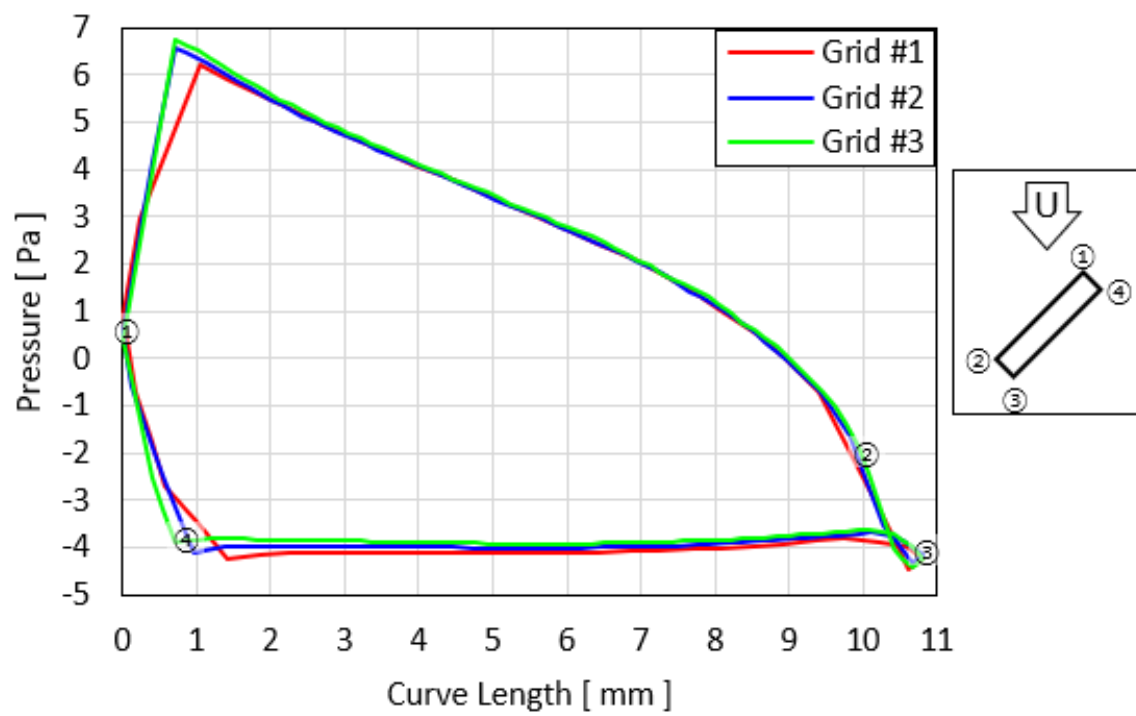

**Figure S1.** Result of the grid test. The vertices of the blade cross-section were named counterclockwise ①–④. Cross section of the blades The Grid #1 grid system exhibits a large difference around ① compared to the Grid #2 and × Grid #3 grid systems.

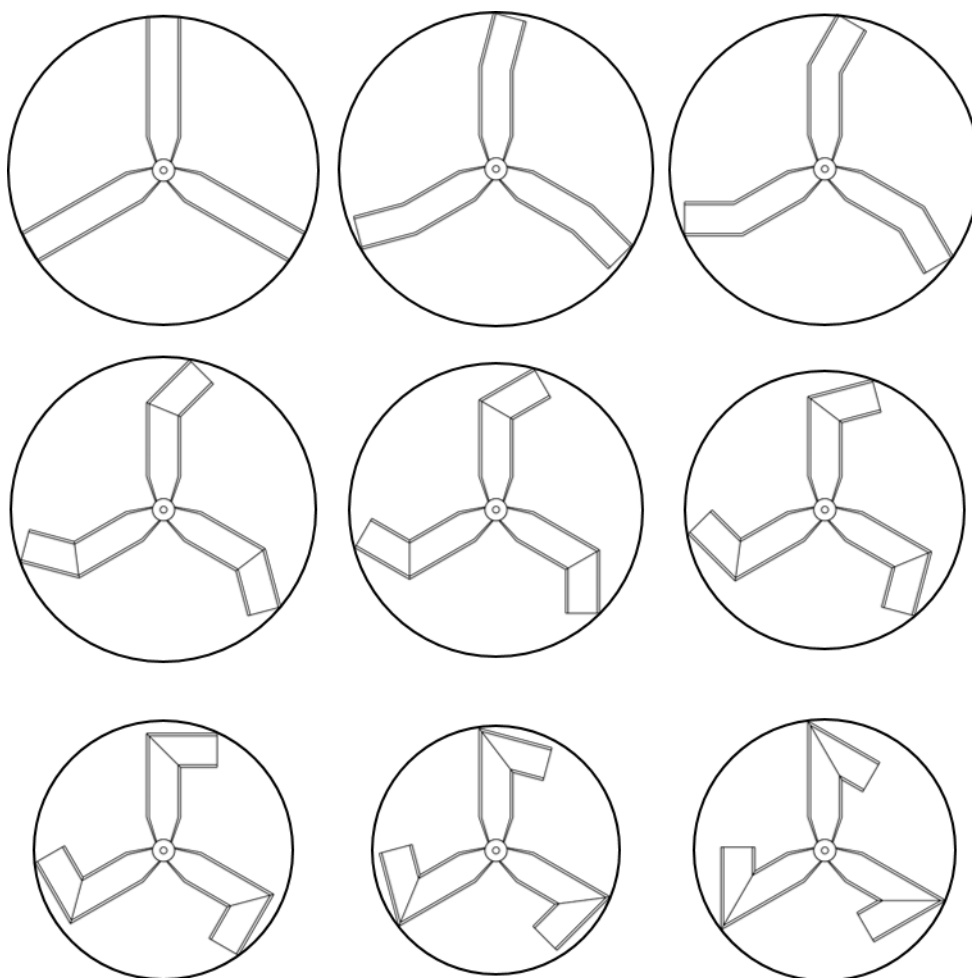

**Figure S2.** Rotor radii for the models. The radius of the A0–A90 and A105–A120 rotors is the distance from the hub to the upper and lower blade tips, respectively.

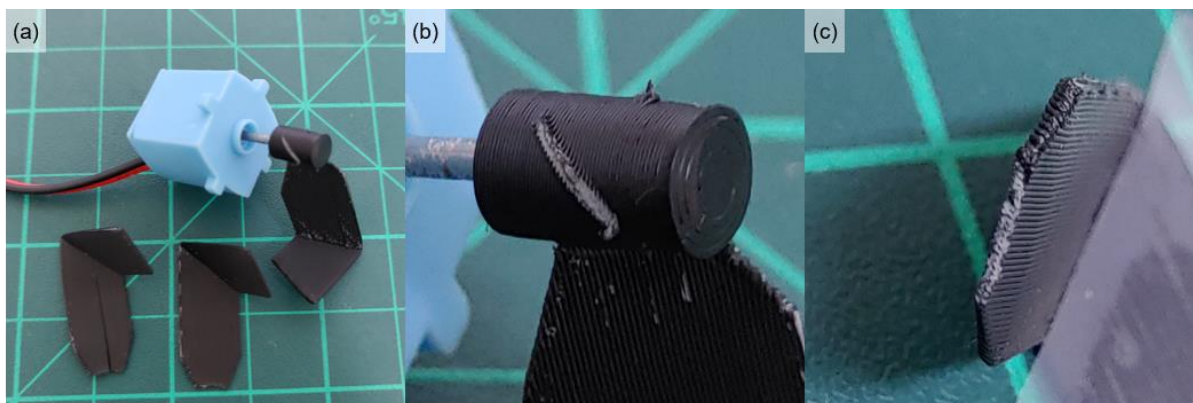

**Figure S3.** Fractured A105 rotor. (a) Rotor fractured at a wind speed around 25 m/s. (b) Fractured cross section of the hub. (c) Fractured cross section of the blade.

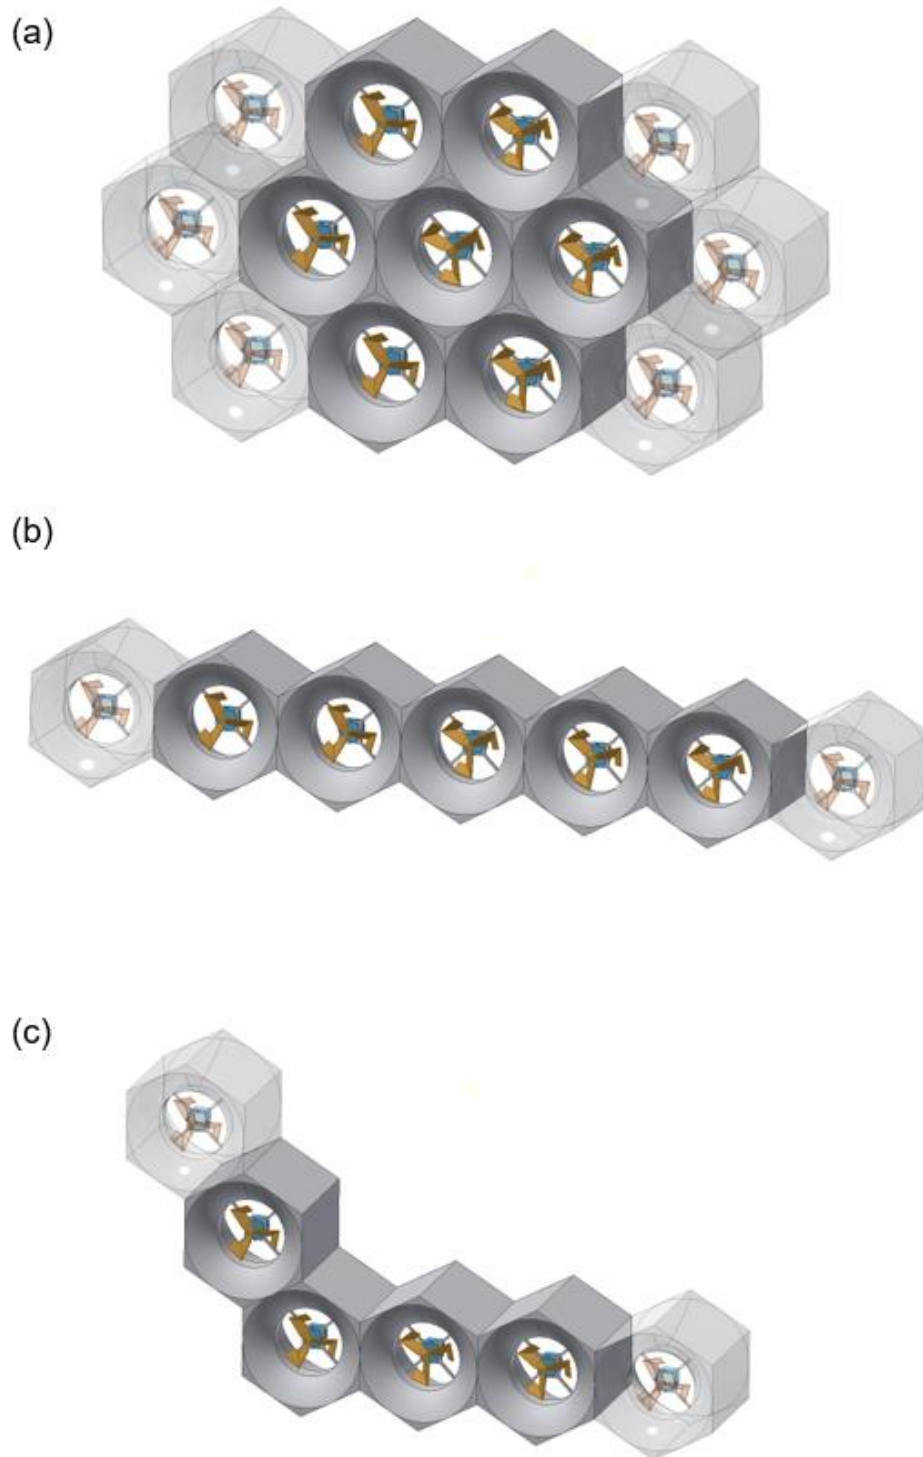

**Figure S4.** Multiple array illustration of SMWT. Various arrangements can be applied as desired: (a) grid array, (b) in-line array, and (c) arbitrary array.
