# Supplementary material
Source: MDPI journal article supplement (https://www.mdpi.com/2227-7390/8/8/1295)
Supplement: s1 [file s1]

Archive with 2 entries (2 files):
- movie s1.mp4
- Supplementary Materials.pdf
